# Supplementary material
Source: PubMed Central journal article supplement (PMC3587365)
Supplement: NIHMS424049-supplement-01.pdf [file NIHMS424049-supplement-01.pdf]

*Supplemental Material for*

**Novel reaction products of glutathione with vapors of an aliphatic (hexamethylene)**

**diisocyanate** by *Adam V. Wisnewski, Morgen Mhike, Justin M. Hettick, Jian Liu, and Paul D.*

*Siegel*

| <u>TABLE OF CONTENTS</u>                                                               | <u>Page #</u> |
|----------------------------------------------------------------------------------------|---------------|
| Supplemental Figure E1. Expected modifications via GSH-HDI reaction products .....     | 2             |
| Supplemental Figure E2. MS/MS of 783.26 <i>m/z</i> product.....                        | 3             |
| Supplemental Figure E3. MS/MS of 450.19 <i>m/z</i> product.....                        | 4             |
| Supplemental Figure E4. MS/MS of 476.17 <i>m/z</i> product.....                        | 5             |
| Supplemental Figure E5. MS/MS of 618.28 <i>m/z</i> product .....                       | 6             |
| Supplemental Figure E6. Correlation: anti-HDI ELISA O.D. vs. acid hydrolyzable HDA.... | 7             |
| Supplemental Figure E7. MS/MS data for novel HDI-GSH modification (spectra).....       | 8             |
| Supplemental Figure E8. MS/MS data for novel HDI-GSH modification (calculations).....  | 9             |
| Supplemental Table E1. MS/MS data identifying HDI modified albumin peptides- .....     | 10            |
| (pH 7 / O/N carbamoylation)                                                            |               |
| Supplemental Table E2. MS/MS data identifying HDI modified albumin peptides- .....     | 10-12         |
| (pH 9 / 3 hr carbamoylation)                                                           |               |

Figure E1. Expected modifications via GSH-HDI reaction products

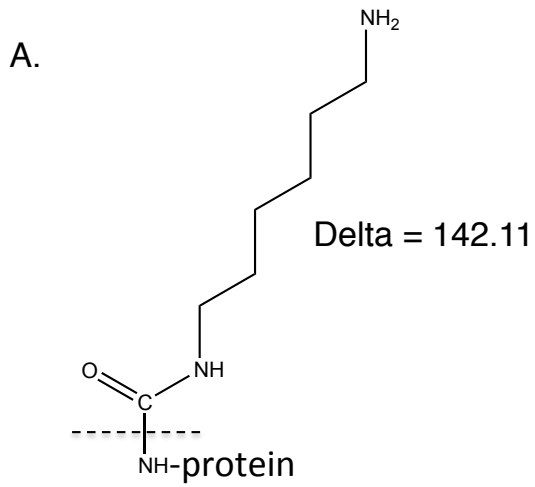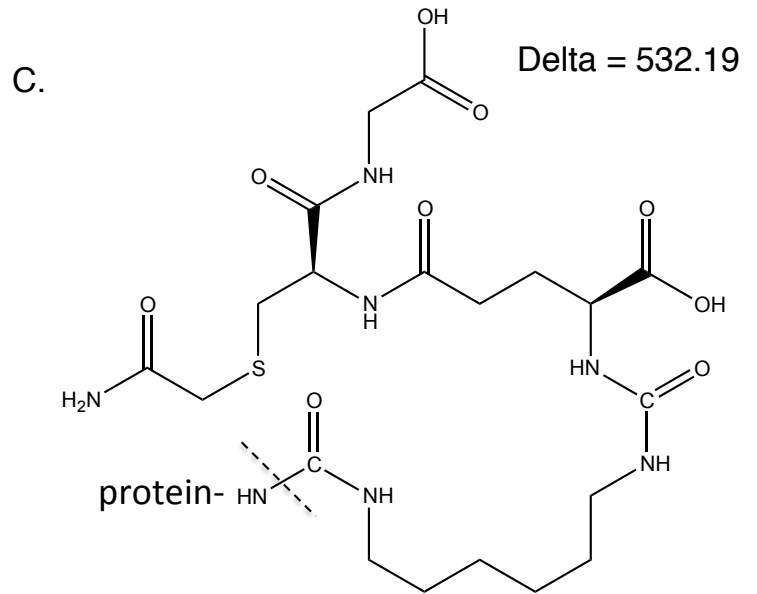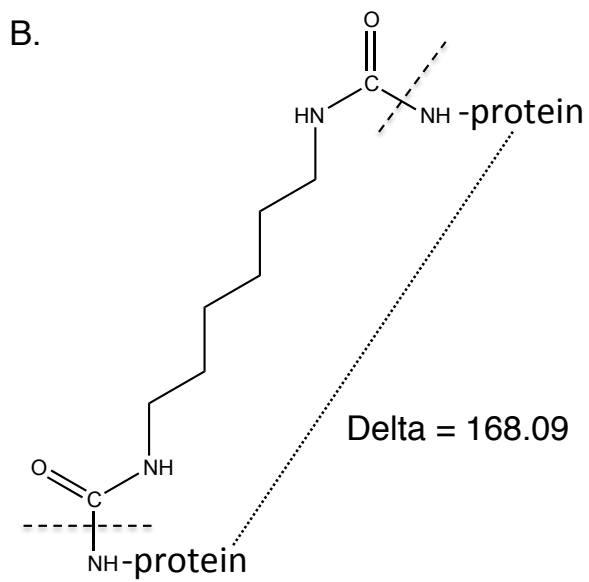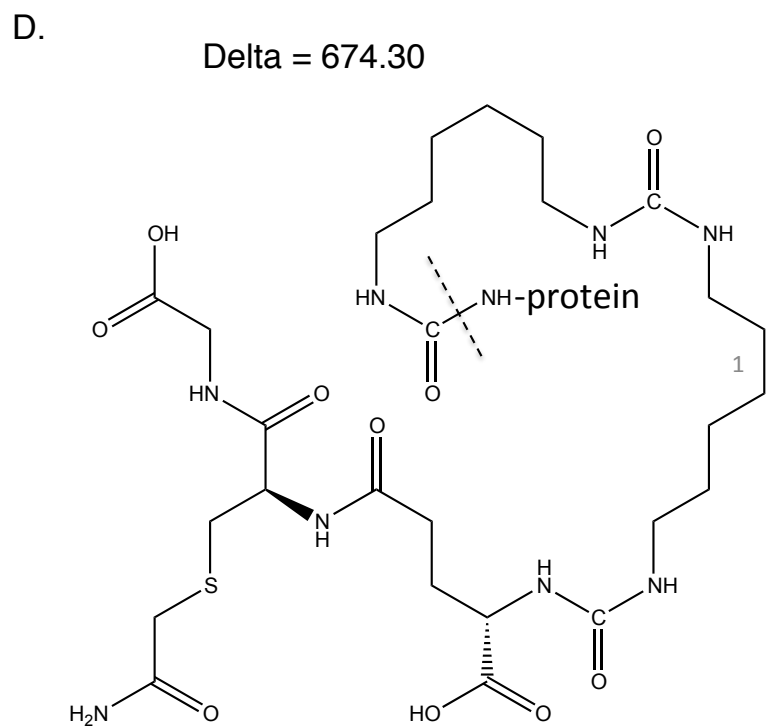

Figure E2. MS/MS of 783.26 m/z product

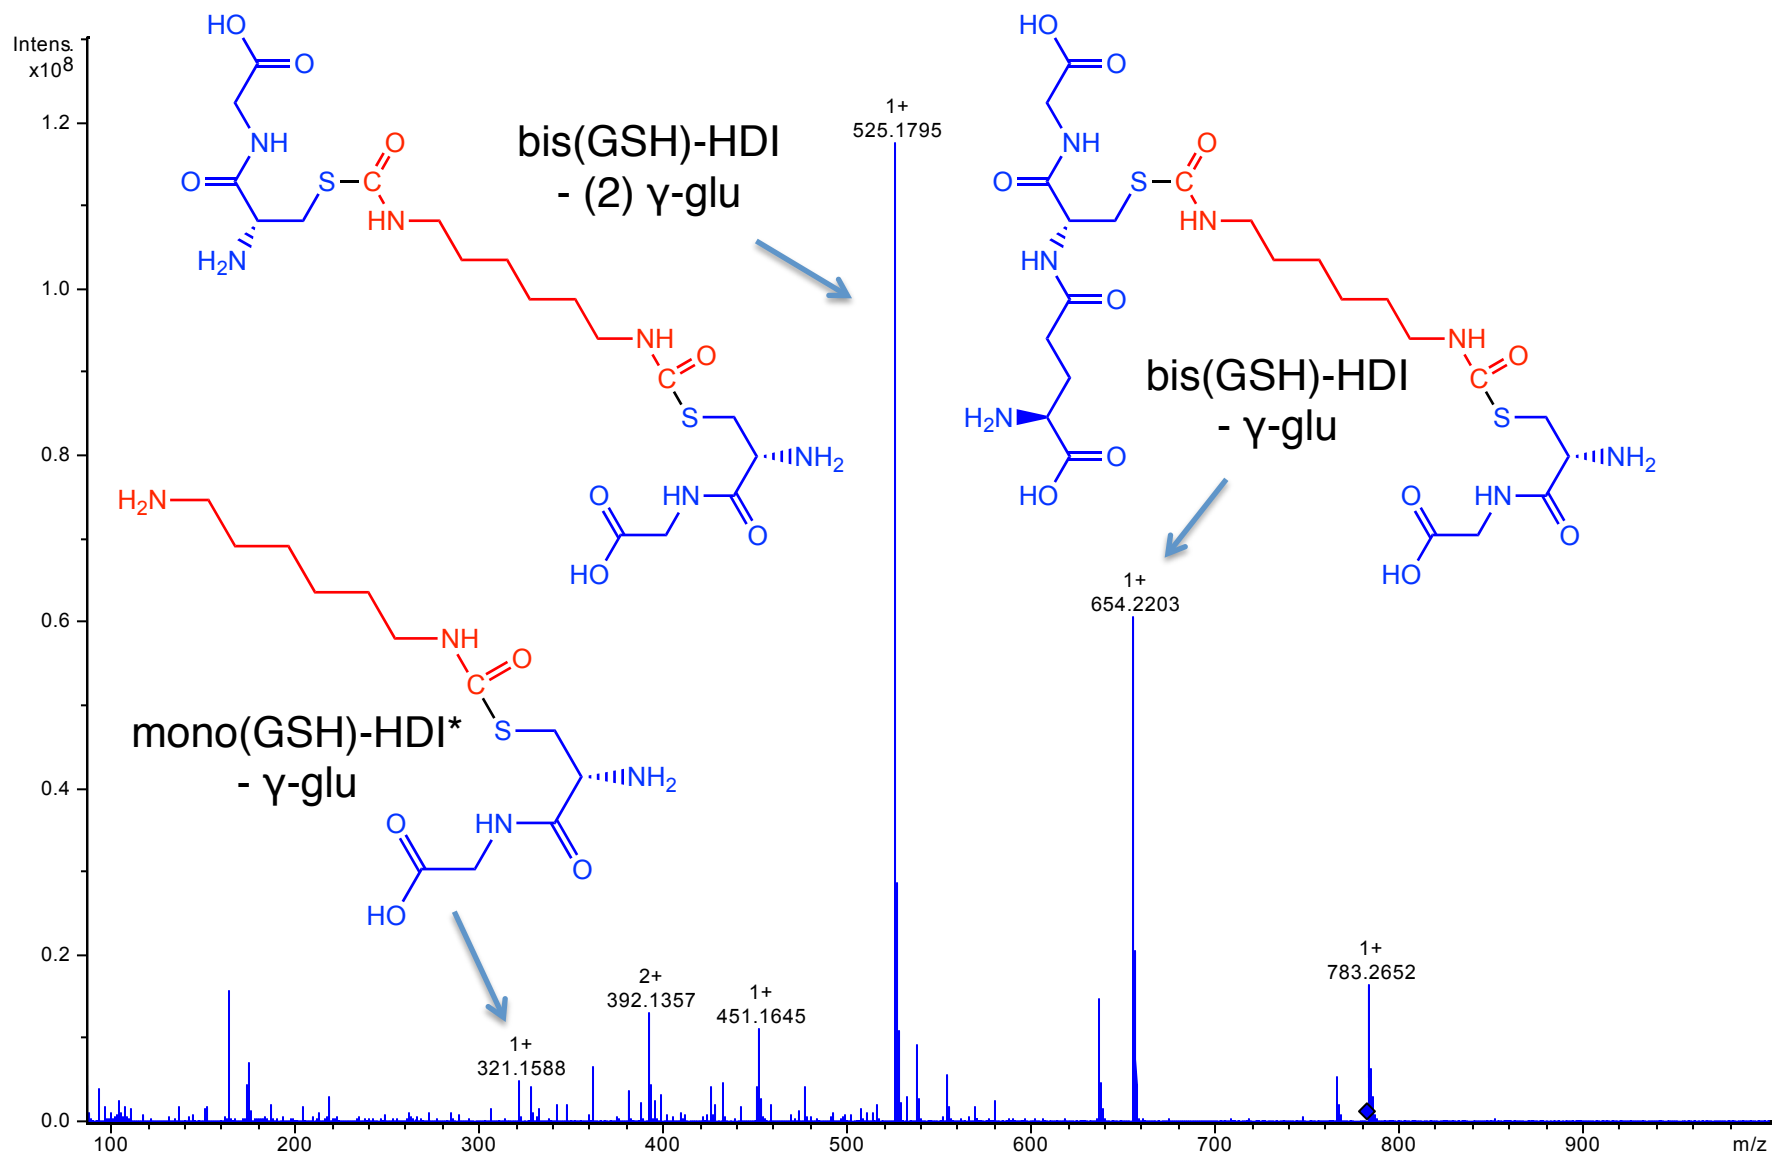

Figure E3. MS/MS of 450.19 m/z product

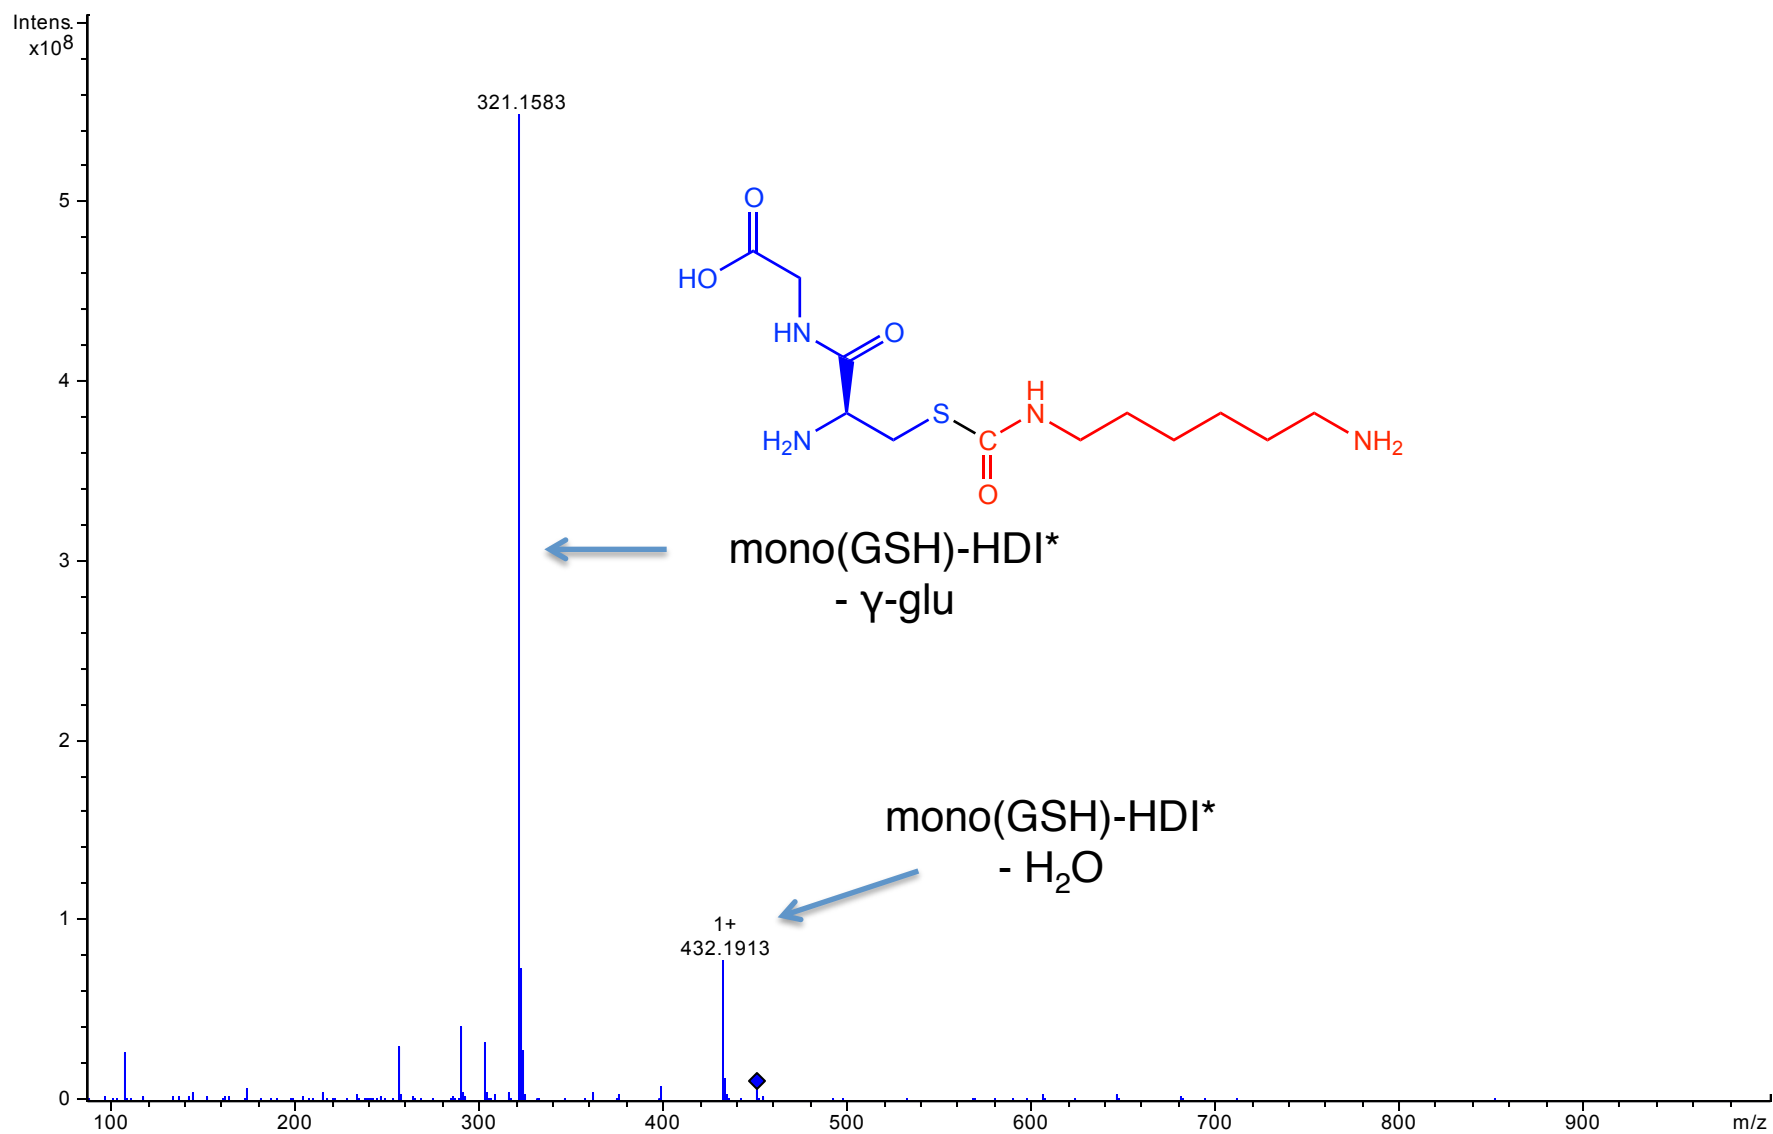

Figure E4. MS/MS of 476.17 m/z product

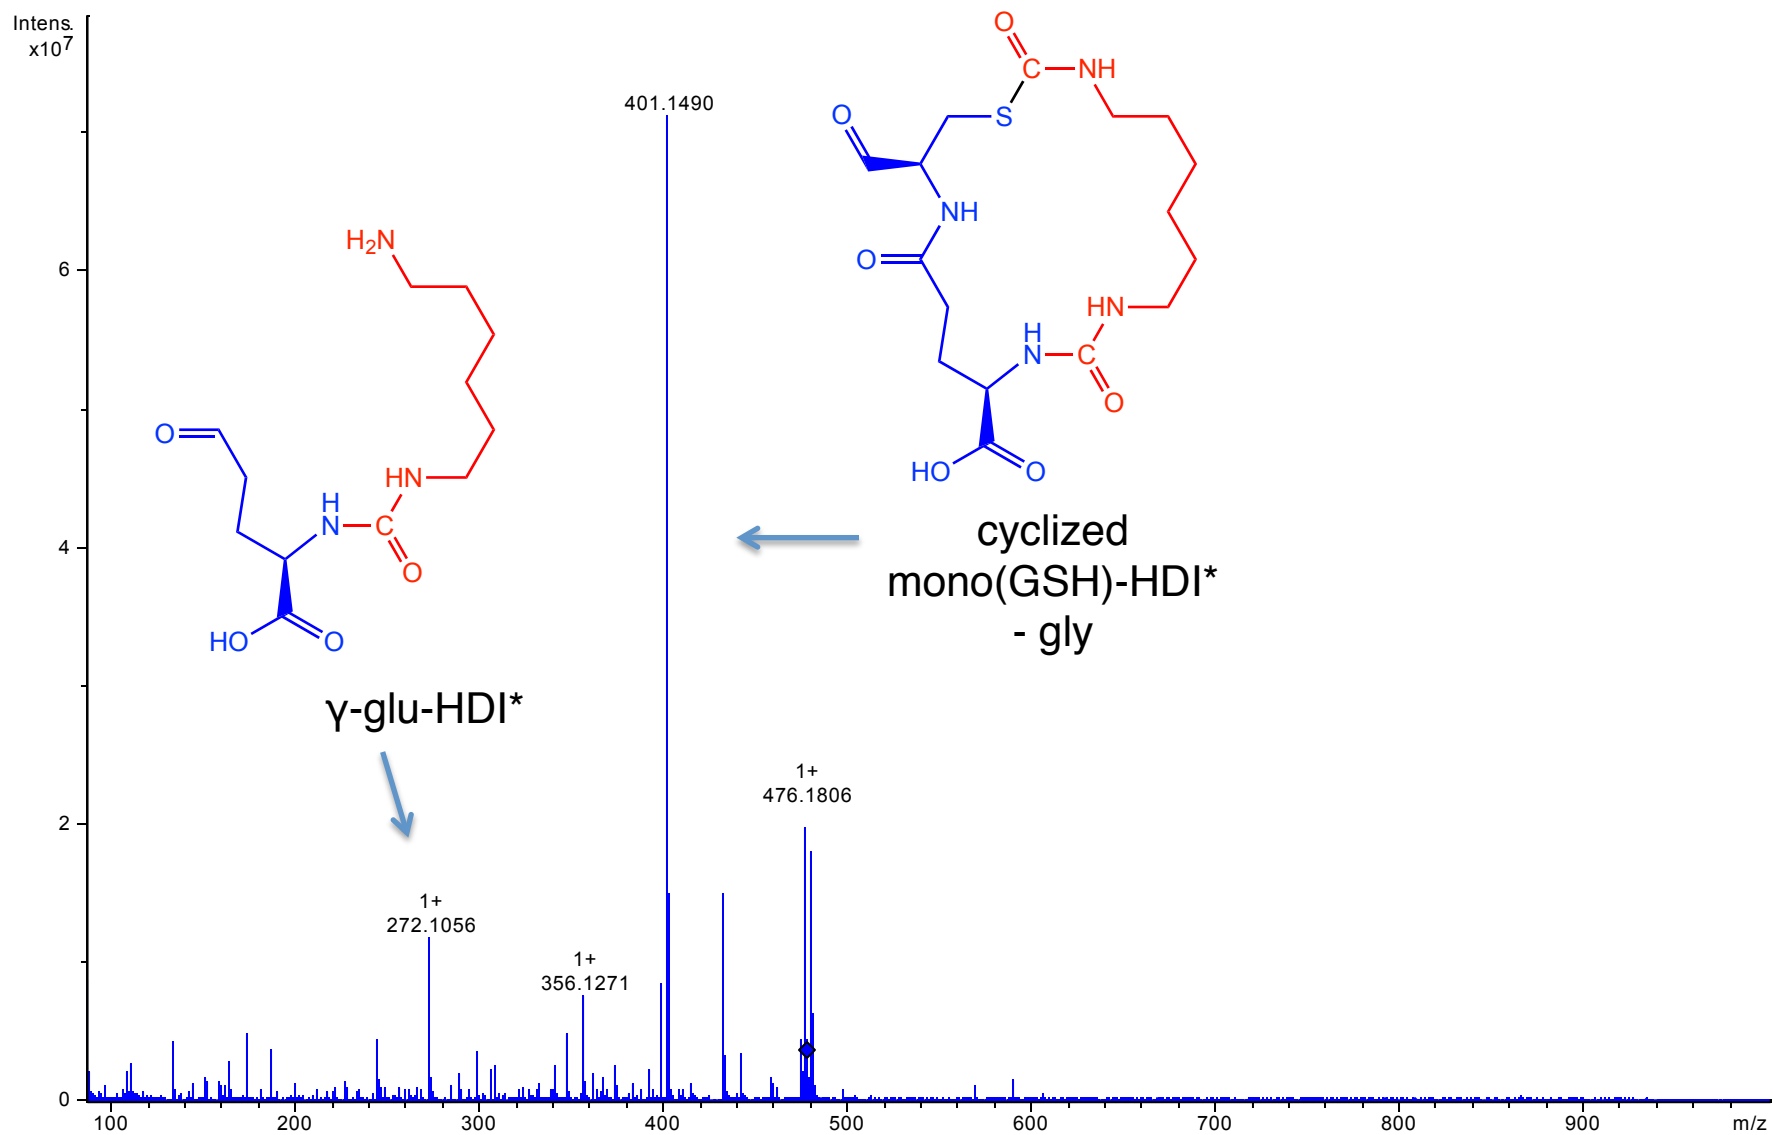

Figure E5. MS/MS of 618.28 m/z product

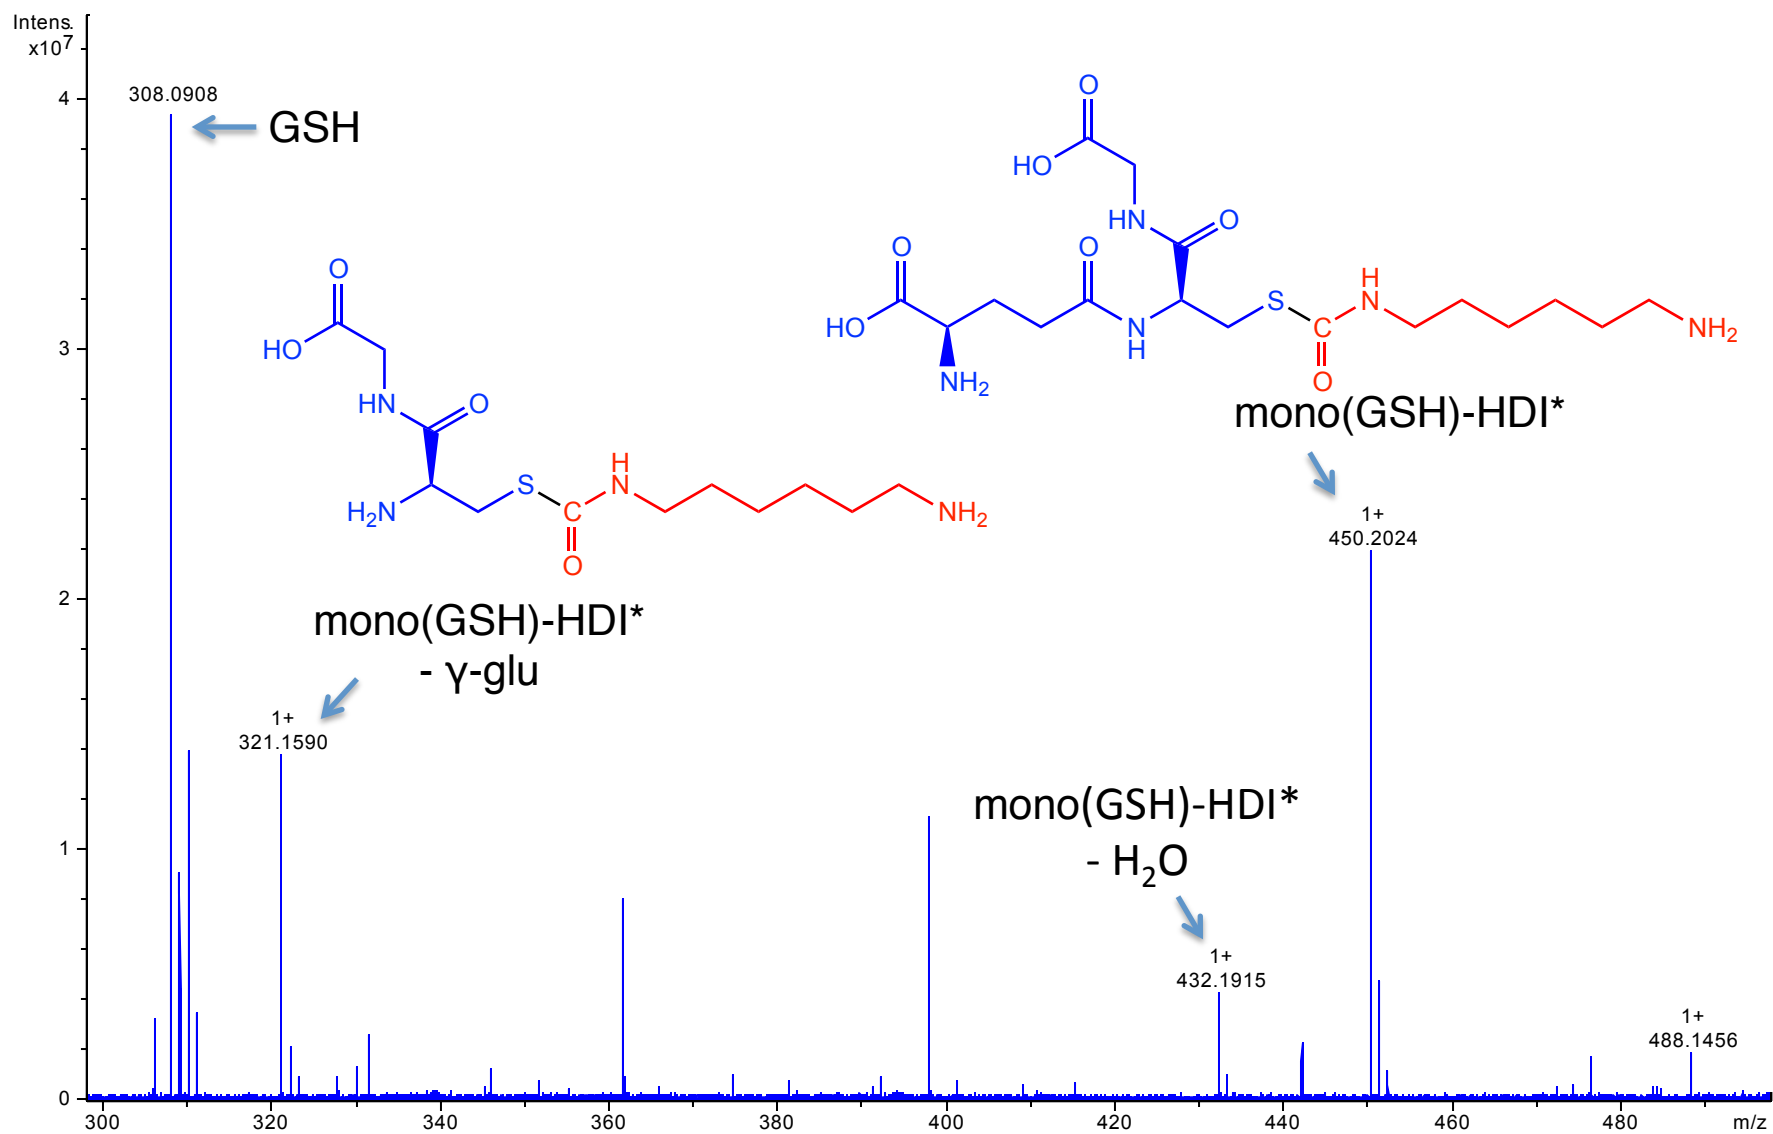

Figure E6. Correlation between anti-HDI ELISA O.D. and amount of acid hydrolyzable HDA

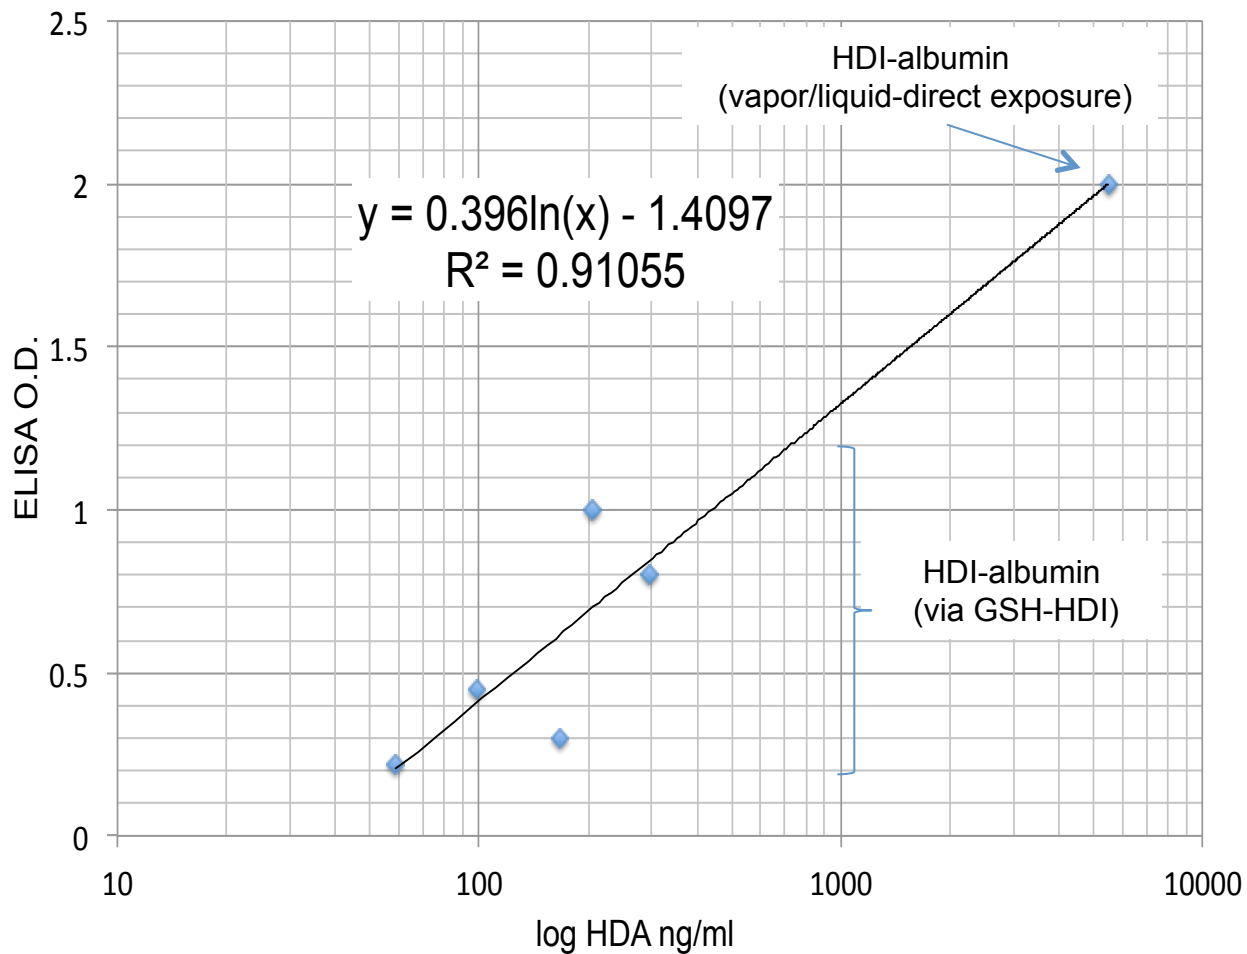

Scatter plot of data for individual samples of human albumin incubated with GSH-HDI at 37°C for 3 hours at pH 9.0, dialyzed against PBS and then analyzed by ELISA with anti-HDI rabbit serum and by HPLC, to quantitate the amount of HDA released upon acid hydrolysis.

Figure E7. MS/MS of novel albumin peptide cross-linked to GSH via HDI. GSH was acetylated during workup

K.VFDEFKPLVEEPQNLIKQNCLEFQLGEYK.F + Carbamidomethyl (C); HDI\_532 (K)

EOT11-0456 #8373 RT: 43.82 AV: 1 NL: 1.82E4

T: FTMS + p NSI d Full ms2 1406.68@hcd28.00 [150.00-2000.00]

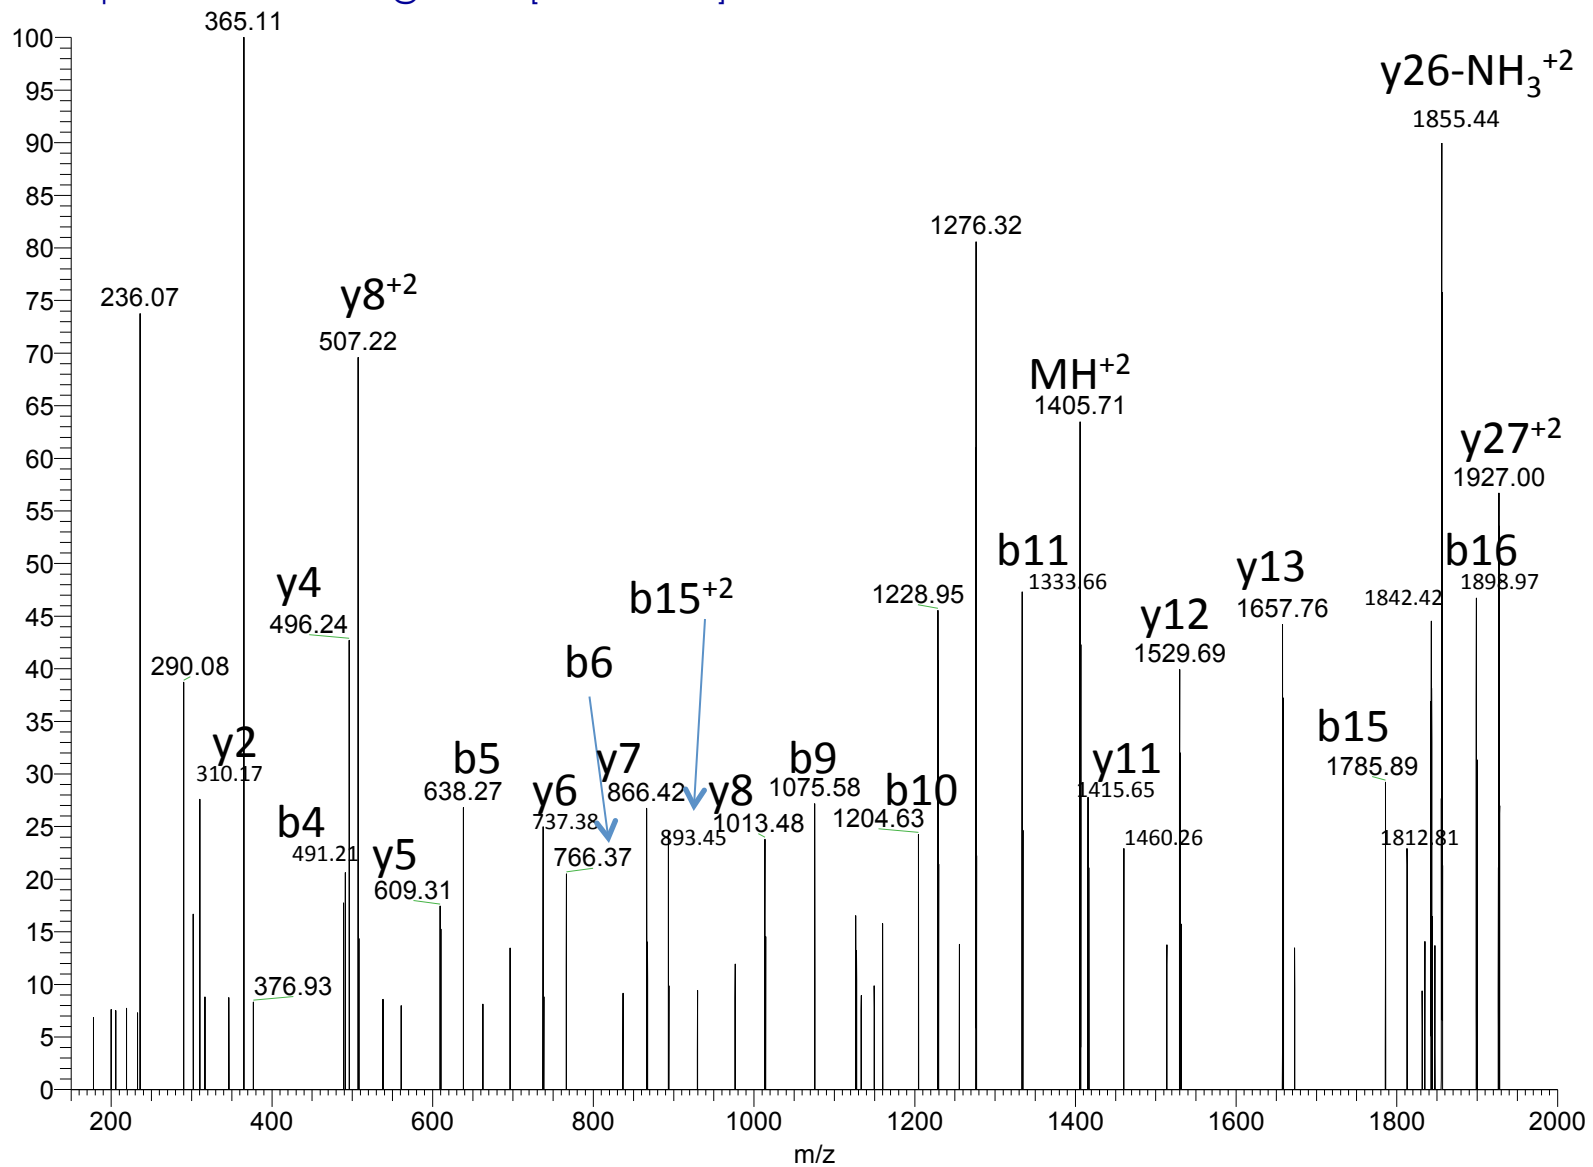



Figure E8. Expected MS/MS data of novel albumin peptide cross-linked to GSH via HDI. GSH was acetylated during workup

K.VFDEFKPLVEEPQNLIKQNCELFEQLGEYK.  
 F + Carbamidomethyl (C); HDI\_532 (K)

Red boxed fragment  
 ions were observed in  
 MS/MS spectra  
 u=HDI-GSH (532) plus Lys

User AA Formula 1: **C26 H46 N9 O9 S1**

Elemental Composition: [C188 H290 N46 O60 S2](#)

| MH <sup>+</sup> (av) | MH <sup>+</sup> (mono) | MH <sup>+</sup> (av) | MH <sup>+</sup> (mono) | MH <sup>+</sup> (av) | MH <sup>+</sup> (mono) |
|----------------------|------------------------|----------------------|------------------------|----------------------|------------------------|
| 4218.6358            | 4216.0491              | 2109.8216            | 2108.5282              | 1406.8835            | 1406.0212              |

**[-] Main Sequence Ions**

| b         | b <sup>+</sup> |    |                    | y  | y <sup>+</sup>      |
|-----------|----------------|----|--------------------|----|---------------------|
| ---       | ---            | 1  | V                  | 30 | ---                 |
| 247.1441  | ---            | 2  | F                  | 29 | 4116.9807 2058.9940 |
| 362.1710  | ---            | 3  | D                  | 28 | 3969.9123 1985.4598 |
| 491.2136  | ---            | 4  | E                  | 27 | 3854.8854 1927.9463 |
| 638.2821  | ---            | 5  | F                  | 26 | 3725.8428 1863.4250 |
| 766.3770  | 383.6921       | 6  | K                  | 25 | 3578.7744 1789.8908 |
| 863.4298  | 432.2185       | 7  | P                  | 24 | 3450.6794 1725.8433 |
| 976.5138  | 488.7606       | 8  | L                  | 23 | 3353.6266 1677.3170 |
| 1075.5823 | 538.2948       | 9  | V                  | 22 | 3240.5426 1620.7749 |
| 1204.6249 | 602.8161       | 10 | E                  | 21 | 3141.4742 1571.2407 |
| 1333.6674 | 667.3374       | 11 | E                  | 20 | 3012.4316 1506.7194 |
| 1430.7202 | 715.8637       | 12 | P                  | 19 | 2883.3890 1442.1981 |
| 1558.7788 | 779.8930       | 13 | Q                  | 18 | 2786.3362 1393.6717 |
| 1672.8217 | 836.9145       | 14 | N                  | 17 | 2658.2776 1329.6424 |
| 1785.9058 | 893.4565       | 15 | L                  | 16 | 2544.2347 1272.6210 |
| 1898.9898 | 949.9986       | 16 | I                  | 15 | 2431.1506 1216.0790 |
| 2559.3038 | 1280.1555      | 17 | u                  | 14 | 2318.0666 1159.5369 |
| 2687.3623 | 1344.1848      | 18 | Q                  | 13 | 1657.7526 829.3800  |
| 2801.4053 | 1401.2063      | 19 | N                  | 12 | 1529.6941 765.3507  |
| 2961.4359 | 1481.2216      | 20 | C(Carbamidomethyl) | 11 | 1415.6511 708.3292  |
| 3090.4785 | 1545.7429      | 21 | E                  | 10 | 1255.6205 628.3139  |
| 3203.5626 | 1602.2849      | 22 | L                  | 9  | 1126.5779 563.7926  |
| 3350.6310 | 1675.8191      | 23 | F                  | 8  | 1013.4938 507.2506  |
| 3479.6736 | 1740.3404      | 24 | E                  | 7  | 866.4254 433.7164   |
| 3607.7322 | 1804.3697      | 25 | Q                  | 6  | 737.3828 369.1951   |
| 3720.8162 | 1860.9117      | 26 | L                  | 5  | 609.3243 305.1658   |
| 3777.8377 | 1889.4225      | 27 | G                  | 4  | 496.2402 248.6237   |
| 3906.8803 | 1953.9438      | 28 | E                  | 3  | 439.2187 220.1130   |
| 4069.9436 | 2035.4754      | 29 | Y                  | 2  | 310.1761 155.5917   |
| ---       | ---            | 30 | K                  | 1  | 147.1128 74.0600    |

Table E1. MS/MS data identifying HDI modified albumin peptides- pH 7.0 / 18 hr carbamylation

| <i>m/z</i> | <i>charge</i> | <i>rel. mol. mass</i> | <i>AA start</i> | <i>AA end</i> | <i>Score</i> | <i>E-value</i> | <i>Sequence</i>                                                                                           | <i>Modifications</i>               | <i>Matched ions</i> |
|------------|---------------|-----------------------|-----------------|---------------|--------------|----------------|-----------------------------------------------------------------------------------------------------------|------------------------------------|---------------------|
| 323.6773   | 4             | 1290.68               | 1               | 10            | 53.31        | 0.0007         | DAHKSEVAHR                                                                                                | HDI 142 (K)                        | 6                   |
| 684.8679   | 2             | 1367.7213             | 11              | 20            | 44.92        | 0.0033         | FKDLGEENFK                                                                                                | HDI 142 (K)                        | 13                  |
| 1188.9539  | 3             | 3563.8399             | 13              | 41            | 111.24       | 5.30E-10       | DLGEENFKALVLI <del>AF</del> AQYLQQCPFEDHVK                                                                | Carbamidomethyl (C); HDI 142 (K)   | 26                  |
| 891.9687   | 4             | 3563.8458             | 13              | 41            | 47.38        | 0.0012         | DLGEENFKALVLI <del>AF</del> AQYLQQCPFEDHVK                                                                | Carbamidomethyl (C); HDI 142 (K)   | 25                  |
| 1255.012   | 3             | 3762.0142             | 21              | 51            | 29.06        | 0.043          | ALVLI <del>AF</del> AQYLQQCPFEDHVKLVNEVTEFAK                                                              | Carbamidomethyl (C); HDI 142 (K)   | 7                   |
| 1320.1179  | 2             | 2638.2212             | 52              | 73            | 48.9         | 0.0014         | <del>TC</del> VADESAE <del>NC</del> DKSLHTLFGDK                                                           | 2 Carbamidomethyl (C); HDI 142 (K) | 17                  |
| 1037.5863  | 2             | 2073.158              | 65              | 81            | 68.29        | 0.0000067      | SLHTLFGD <del>K</del> LCTVATLR                                                                            | Carbamidomethyl (C); HDI 142 (K)   | 12                  |
| 692.06     | 3             | 2073.1583             | 65              | 81            | 50.53        | 0.0004         | SLHTLFGD <del>K</del> LCTVATLR                                                                            | Carbamidomethyl (C); HDI 142 (K)   | 17                  |
| 974.1687   | 3             | 2919.4843             | 115             | 137           | 47.45        | 0.002          | LVRPEVDVMCTAFHDNEETFLK <del>K</del>                                                                       | Carbamidomethyl (C); HDI 142 (K)   | 18                  |
| 730.8728   | 4             | 2919.4623             | 115             | 137           | 46.17        | 0.0028         | LVRPEVDVMCTAFHDNEETFLK <del>K</del>                                                                       | Carbamidomethyl (C); HDI 142 (K)   | 25                  |
| 399.9076   | 3             | 1196.7009             | 137             | 144           | 40.85        | 0.0028         | KYLYE <del>I</del> AR                                                                                     | HDI 142 (K)                        | 6                   |
| 599.3584   | 2             | 1196.7022             | 137             | 144           | 40.71        | 0.0029         | KYLYE <del>I</del> AR                                                                                     | HDI 142 (K)                        | 7                   |
| 602.2884   | 3             | 1803.8434             | 161             | 174           | 93.15        | 4.60E-08       | YKAAFT <del>E</del> CCQAADK                                                                               | 2 Carbamidomethyl (C); HDI 142 (K) | 9                   |
| 902.9288   | 2             | 1803.843              | 161             | 174           | 92.3         | 5.60E-08       | YKAAFT <del>E</del> CCQAADK                                                                               | 2 Carbamidomethyl (C); HDI 142 (K) | 11                  |
| 1134.0615  | 2             | 2266.1084             | 163             | 181           | 99.68        | 1.60E-08       | AAFT <del>E</del> CCQAADKAA <del>CL</del> LPK                                                             | 3 Carbamidomethyl (C); HDI 142 (K) | 21                  |
| 669.3591   | 2             | 1336.7037             | 200             | 209           | 47.49        | 0.0018         | CASLQK <del>F</del> GER                                                                                   | Carbamidomethyl (C); HDI 142 (K)   | 8                   |
| 697.8929   | 2             | 1393.7712             | 223             | 233           | 49.87        | 0.00063        | FPKAE <del>F</del> AEVSK                                                                                  | HDI 142 (K)                        | 9                   |
| 695.3556   | 3             | 2083.0449             | 258             | 274           | 71.4         | 0.00001        | ADLAKYI <del>C</del> ENQDSISSK                                                                            | Carbamidomethyl (C); HDI 142 (K)   | 18                  |
| 913.9767   | 2             | 1825.9388             | 263             | 276           | 55.26        | 0.00035        | YI <del>C</del> ENQDSISSK <del>L</del> K                                                                  | Carbamidomethyl (C); HDI 142 (K)   | 9                   |
| 844.9639   | 2             | 1687.9133             | 275             | 286           | 55.09        | 0.00031        | L <del>K</del> ECCEK <del>P</del> LLEK                                                                    | 2 Carbamidomethyl (C); HDI 142 (K) | 9                   |
| 422.9859   | 4             | 1687.9145             | 275             | 286           | 37.29        | 0.018          | L <del>K</del> ECCEK <del>P</del> LLEK                                                                    | 2 Carbamidomethyl (C); HDI 142 (K) | 8                   |
| 1206.9059  | 3             | 3617.6959             | 287             | 317           | 84.96        | 3.00E-07       | SHCIAE <del>V</del> END <del>E</del> MPADLPSLAAD <del>F</del> VESK <del>D</del> V <del>C</del> K          | 2 Carbamidomethyl (C); HDI 142 (K) | 22                  |
| 905.4322   | 4             | 3617.6995             | 287             | 317           | 45.78        | 0.0025         | SHCIAE <del>V</del> END <del>E</del> MPADLPSLAAD <del>F</del> VESK <del>D</del> V <del>C</del> K          | 2 Carbamidomethyl (C); HDI 142 (K) | 14                  |
| 480.2804   | 3             | 1437.8194             | 349             | 359           | 48.04        | 0.0008         | LAKTY <del>E</del> T <del>T</del> L <del>E</del> K                                                        | HDI 142 (K)                        | 7                   |
| 719.9167   | 2             | 1437.8188             | 349             | 359           | 38.98        | 0.0065         | LAKTY <del>E</del> T <del>T</del> L <del>E</del> K                                                        | HDI 142 (K)                        | 8                   |
| 887.4049   | 3             | 2659.1929             | 352             | 372           | 71.12        | 0.0000056      | TYET <del>T</del> L <del>E</del> KCCAAAD <del>P</del> HECYAK                                              | 3 Carbamidomethyl (C); HDI 142 (K) | 20                  |
| 1330.6049  | 2             | 2659.1952             | 352             | 372           | 50.64        | 0.00064        | TYET <del>T</del> L <del>E</del> KCCAAAD <del>P</del> HECYAK                                              | 3 Carbamidomethyl (C); HDI 142 (K) | 17                  |
| 1275.9958  | 3             | 3824.9656             | 373             | 402           | 55.22        | 0.0002         | VFDEFK <del>P</del> LVEE <del>P</del> QNLIKQ <del>N</del> CELFEQLGEYK                                     | Carbamidomethyl (C); HDI 142 (K)   | 16                  |
| 957.2484   | 4             | 3824.9645             | 373             | 402           | 34.24        | 0.025          | VFDEFK <del>P</del> LVEE <del>P</del> QNLIKQ <del>N</del> CELFEQLGEYK                                     | Carbamidomethyl (C); HDI 142 (K)   | 21                  |
| 729.7465   | 3             | 2186.2177             | 373             | 389           | 54.18        | 0.00017        | VFDEFK <del>P</del> LVEE <del>P</del> QNLIK                                                               | HDI 142 (K)                        | 16                  |
| 1094.1148  | 2             | 2186.215              | 373             | 389           | 48.49        | 0.00065        | VFDEFK <del>P</del> LVEE <del>P</del> QNLIK                                                               | HDI 142 (K)                        | 17                  |
| 1371.2166  | 2             | 2740.4186             | 390             | 410           | 90.55        | 8.00E-08       | Q <del>N</del> CELFEQLGEYK <del>F</del> Q <del>N</del> ALLV <del>R</del>                                  | Carbamidomethyl (C); HDI 142 (K)   | 14                  |
| 914.4813   | 3             | 2740.422              | 390             | 410           | 81.81        | 5.80E-07       | Q <del>N</del> CELFEQLGEYK <del>F</del> Q <del>N</del> ALLV <del>R</del>                                  | Carbamidomethyl (C); HDI 142 (K)   | 23                  |
| 891.5346   | 2             | 1781.0546             | 414             | 428           | 67           | 0.0000032      | KVPQV <del>S</del> TPTLVEV <del>S</del> R                                                                 | HDI 142 (K)                        | 8                   |
| 1105.8968  | 3             | 3314.6686             | 446             | 472           | 49.08        | 0.0012         | MPC <del>A</del> E <del>D</del> YLSV <del>V</del> LNQLC <del>V</del> LHEK <del>T</del> PV <del>S</del> DR | 2 Carbamidomethyl (C); HDI 142 (K) | 11                  |
| 829.6758   | 4             | 3314.674              | 446             | 472           | 44.09        | 0.0037         | MPC <del>A</del> E <del>D</del> YLSV <del>V</del> LNQLC <del>V</del> LHEK <del>T</del> PV <del>S</del> DR | 2 Carbamidomethyl (C); HDI 142 (K) | 20                  |
| 536.9496   | 3             | 1607.8269             | 473             | 484           | 56.97        | 0.00027        | VTK <del>C</del> CTE <del>S</del> LV <del>N</del> R                                                       | 2 Carbamidomethyl (C); HDI 142 (K) | 9                   |
| 804.9202   | 2             | 1607.8259             | 473             | 484           | 56.04        | 0.00033        | VTK <del>C</del> CTE <del>S</del> LV <del>N</del> R                                                       | 2 Carbamidomethyl (C); HDI 142 (K) | 10                  |
| 896.4295   | 3             | 2686.2666             | 501             | 521           | 51.5         | 0.00079        | EFNAE <del>T</del> FTFHADICTLSE <del>K</del> ER                                                           | Carbamidomethyl (C); HDI 142 (K)   | 22                  |
| 424.278    | 3             | 1269.8121             | 525             | 534           | 61.48        | 0.0000063      | KQTALV <del>E</del> LVK                                                                                   | HDI 142 (K)                        | 7                   |
| 635.9132   | 2             | 1269.8119             | 525             | 534           | 58.82        | 0.000012       | KQTALV <del>E</del> LVK                                                                                   | HDI 142 (K)                        | 8                   |
| 661.6858   | 3             | 1982.0357             | 542             | 557           | 85.38        | 3.40E-07       | EQLKAV <del>M</del> DDFAAFV <del>E</del> K                                                                | HDI 142 (K)                        | 11                  |
| 667.0174   | 3             | 1998.0304             | 542             | 557           | 62.94        | 0.000063       | EQLKAV <del>M</del> DDFAAFV <del>E</del> K                                                                | HDI 142 (K); Oxidation (M)         | 10                  |
| 1000.0233  | 2             | 1998.032              | 542             | 557           | 53.32        | 0.00057        | EQLKAV <del>M</del> DDFAAFV <del>E</del> K                                                                | HDI 142 (K); Oxidation (M)         | 20                  |
| 821.3824   | 2             | 1640.7502             | 561             | 573           | 49.14        | 0.0011         | ADDK <del>E</del> T <del>C</del> FAE <del>E</del> GK                                                      | Carbamidomethyl (C); HDI 142 (K)   | 7                   |
| 642.4114   | 2             | 1282.8083             | 574             | 585           | 76.68        | 2.20E-07       | KLVAASQAA <del>L</del> GL                                                                                 | HDI 142 (K)                        | 8                   |

Table E2. MS/MS data identifying HDI modified albumin peptides- pH 9.0 / 3 hr carbamylation

| <i>m/z</i> | <i>charge</i> | <i>rel. mol. mass</i> | <i>AA start</i> | <i>AA end</i> | <i>Score</i> | <i>E-value</i> | <i>Sequence</i>                                 | <i>Modifications</i>               | <i>matched ions</i> |
|------------|---------------|-----------------------|-----------------|---------------|--------------|----------------|-------------------------------------------------|------------------------------------|---------------------|
| 323.6772   | 4             | 1290.6798             | 1               | 10            | 36.64        | 0.036          | DAHKSEVAHR                                      | HDI 142 (K)                        | 5                   |
| 684.8612   | 2             | 1367.7078             | 11              | 20            | 42.23        | 0.0064         | FKDLGEENFK                                      | HDI 142 (K)                        | 7                   |
| 456.91     | 3             | 1367.7082             | 11              | 20            | 45.56        | 0.003          | FKDLGEENFK                                      | HDI 142 (K)                        | 7                   |
| 891.9611   | 4             | 3563.8153             | 13              | 41            | 57.1         | 0.00016        | DLGEENFKALVLI <del>AF</del> AQYLQQCPFEDHVK      | Carbamidomethyl (C); HDI 142 (K)   | 28                  |
| 1188.9442  | 3             | 3563.8108             | 13              | 41            | 101.83       | 5.50E-09       | DLGEENFKALVLI <del>AF</del> AQYLQQCPFEDHVK      | Carbamidomethyl (C); HDI 142 (K)   | 25                  |
| 941.5031   | 4             | 3761.9831             | 21              | 51            | 40.3         | 0.0043         | ALVLI <del>AF</del> AQYLQQCPFEDHVKLVNEVTEFAK    | Carbamidomethyl (C); HDI 142 (K)   | 13                  |
| 1255.0014  | 3             | 3761.9824             | 21              | 51            | 65.13        | 0.000014       | ALVLI <del>AF</del> AQYLQQCPFEDHVKLVNEVTEFAK    | Carbamidomethyl (C); HDI 142 (K)   | 26                  |
| 880.4066   | 3             | 2638.1979             | 52              | 73            | 42.93        | 0.0045         | <del>TC</del> VADESAE <del>NC</del> DKSLHTLFGDK | 2 Carbamidomethyl (C); HDI 142 (K) | 11                  |

Table E2. MS/MS data identifying HDI modified albumin peptides- pH 9.0 / 3 hr carbamoylation

| <i>m/z</i> | <i>charge</i> | <i>rel. mol. mass</i> | <i>AA start</i> | <i>AA end</i> | <i>Score</i> | <i>E-value</i> | <i>Sequence</i>                       | <i>Modifications</i>                            | <i>matched ions</i> |
|------------|---------------|-----------------------|-----------------|---------------|--------------|----------------|---------------------------------------|-------------------------------------------------|---------------------|
| 1320.1064  | 2             | 2638.1982             | 52              | 73            | 56.81        | 0.00018        | TCVADESAENC DKSLHTLFGDK               | 2 Carbamidomethyl (C); HDI 142 (K)              | 17                  |
| 519.292    | 4             | 2073.1391             | 65              | 81            | 40.09        | 0.0062         | SLHTLFGDKLCTVATLR                     | Carbamidomethyl (C); HDI 142 (K)                | 12                  |
| 692.0533   | 3             | 2073.138              | 65              | 81            | 43.29        | 0.003          | SLHTLFGDKLCTVATLR                     | Carbamidomethyl (C); HDI 142 (K)                | 15                  |
| 1037.577   | 2             | 2073.1394             | 65              | 81            | 79.1         | 7.80E-07       | SLHTLFGDKLCTVATLR                     | Carbamidomethyl (C); HDI 142 (K)                | 13                  |
| 1108.4725  | 2             | 2214.9304             | 82              | 98            | 34.68        | 0.0091         | ETYGEMADCCAKQEPER                     | 2 Carbamidomethyl (C); HDI 142 (K)              | 17                  |
| 713.6849   | 3             | 2138.0329             | 99              | 114           | 35.82        | 0.036          | NECFLQHKDDNPNLPR                      | Carbamidomethyl (C); HDI 142 (K)                | 16                  |
| 584.8986   | 5             | 2919.4566             | 115             | 137           | 39.45        | 0.014          | LVRPEVDVMCTAFHDNEETFLKK               | Carbamidomethyl (C); HDI 142 (K)                | 20                  |
| 974.1595   | 3             | 2919.4566             | 115             | 137           | 45.71        | 0.0032         | LVRPEVDVMCTAFHDNEETFLKK               | Carbamidomethyl (C); HDI 142 (K)                | 12                  |
| 730.8723   | 4             | 2919.4603             | 115             | 137           | 47.36        | 0.0022         | LVRPEVDVMCTAFHDNEETFLKK               | Carbamidomethyl (C); HDI 142 (K)                | 20                  |
| 734.871    | 4             | 2935.4548             | 115             | 137           | 37.96        | 0.019          | LVRPEVDVMCTAFHDNEETFLKK               | Carbamidomethyl (C); HDI 142 (K); Oxidation (M) | 18                  |
| 599.3521   | 2             | 1196.6897             | 137             | 144           | 42.22        | 0.0025         | KYLVEIAR                              | HDI 142 (K)                                     | 7                   |
| 399.9045   | 3             | 1196.6917             | 137             | 144           | 54.75        | 0.00014        | KYLVEIAR                              | HDI 142 (K)                                     | 7                   |
| 902.9204   | 2             | 1803.8262             | 161             | 174           | 85.31        | 2.30E-07       | YKAAFTCCQAADK                         | 2 Carbamidomethyl (C); HDI 142 (K)              | 22                  |
| 602.2827   | 3             | 1803.8264             | 161             | 174           | 93.16        | 3.80E-08       | YKAAFTCCQAADK                         | 2 Carbamidomethyl (C); HDI 142 (K)              | 9                   |
| 1134.0509  | 2             | 2266.0872             | 163             | 181           | 76.33        | 0.0000032      | AAFTECCQAADKAAACLLPK                  | 3 Carbamidomethyl (C); HDI 142 (K)              | 22                  |
| 514.3006   | 3             | 1539.8799             | 175             | 186           | 36.46        | 0.0098         | AACLLPKLDELRL                         | Carbamidomethyl (C); HDI 142 (K)                | 13                  |
| 770.9476   | 2             | 1539.8806             | 175             | 186           | 38.99        | 0.0055         | AACLLPKLDELRL                         | Carbamidomethyl (C); HDI 142 (K)                | 9                   |
| 669.353    | 2             | 1336.6914             | 200             | 209           | 36.43        | 0.025          | CASLQKFGER                            | Carbamidomethyl (C); HDI 142 (K)                | 7                   |
| 581.348    | 2             | 1160.6815             | 210             | 218           | 33.61        | 0.039          | AFKAWAVAR                             | HDI 142 (K)                                     | 7                   |
| 697.8873   | 2             | 1393.76               | 223             | 233           | 48.26        | 0.0011         | FPKAEFAEVSK                           | HDI 142 (K)                                     | 9                   |
| 598.3397   | 3             | 1791.9974             | 226             | 240           | 49.93        | 0.00059        | AEFAEVSKLVTDLTK                       | HDI 142 (K)                                     | 15                  |
| 897.0058   | 2             | 1791.9971             | 226             | 240           | 73.48        | 0.0000026      | AEFAEVSKLVTDLTK                       | HDI 142 (K)                                     | 12                  |
| 1000.4707  | 3             | 2998.3903             | 234             | 257           | 36.51        | 0.024          | LVTDLTKVHTECCGHDLLCADDR               | 3 Carbamidomethyl (C); HDI 142 (K)              | 17                  |
| 1042.5186  | 2             | 2083.0226             | 258             | 274           | 74.91        | 0.0000047      | ADLAKYICENQDSISSK                     | Carbamidomethyl (C); HDI 142 (K)                | 19                  |
| 695.3488   | 3             | 2083.0247             | 258             | 274           | 94.41        | 5.20E-08       | ADLAKYICENQDSISSK                     | Carbamidomethyl (C); HDI 142 (K)                | 18                  |
| 913.968    | 2             | 1825.9214             | 263             | 276           | 43.67        | 0.0055         | YICENQDSISSKLLK                       | Carbamidomethyl (C); HDI 142 (K)                | 7                   |
| 563.6403   | 3             | 1687.899              | 275             | 286           | 33.94        | 0.044          | LKECCEKPLLEK                          | 2 Carbamidomethyl (C); HDI 142 (K)              | 7                   |
| 422.9822   | 4             | 1687.8996             | 275             | 286           | 42.3         | 0.0065         | LKECCEKPLLEK                          | 2 Carbamidomethyl (C); HDI 142 (K)              | 8                   |
| 844.9566   | 2             | 1687.8986             | 275             | 286           | 48.71        | 0.0014         | LKECCEKPLLEK                          | 2 Carbamidomethyl (C); HDI 142 (K)              | 9                   |
| 1468.3543  | 3             | 4402.0411             | 277             | 313           | 46.83        | 0.0014         | ECCEKPLLEKSHCIAEVENDEMPADLPSLAADFVESK | 3 Carbamidomethyl (C); HDI 142 (K)              | 10                  |
| 1079.5165  | 4             | 4314.0369             | 277             | 313           | 34           | 0.029          | ECCEKPLLEKSHCIAEVENDEMPADLPSLAADFVESK | Carbamidomethyl (C); HDI 168 (K)                | 11                  |
| 905.4235   | 4             | 3617.6649             | 287             | 317           | 56.79        | 0.00017        | SHCIAEVENDEMPADLPSLAADFVESKDVCK       | 2 Carbamidomethyl (C); HDI 142 (K)              | 20                  |
| 1206.8946  | 3             | 3617.662              | 287             | 317           | 83.32        | 3.60E-07       | SHCIAEVENDEMPADLPSLAADFVESKDVCK       | 2 Carbamidomethyl (C); HDI 142 (K)              | 24                  |
| 1221.6112  | 2             | 2441.2078             | 318             | 336           | 73.22        | 0.0000063      | NYAEAKDVLFGMFLYEYAR                   | HDI 142 (K)                                     | 17                  |
| 719.9108   | 2             | 1437.8069             | 349             | 359           | 36.8         | 0.012          | LAKTYETTLEK                           | HDI 142 (K)                                     | 8                   |
| 480.2758   | 3             | 1437.8057             | 349             | 359           | 48.46        | 0.00085        | LAKTYETTLEK                           | HDI 142 (K)                                     | 7                   |
| 665.7999   | 4             | 2659.1707             | 352             | 372           | 34.45        | 0.02           | TYETTTLEKCCAAADPHCEYAK                | 3 Carbamidomethyl (C); HDI 142 (K)              | 16                  |
| 1330.5881  | 2             | 2659.1616             | 352             | 372           | 68.93        | 0.0000065      | TYETTTLEKCCAAADPHCEYAK                | 3 Carbamidomethyl (C); HDI 142 (K)              | 22                  |
| 1275.9847  | 3             | 3824.9323             | 373             | 402           | 62.64        | 0.000042       | VFDEFKPLVEEPQNLIKQNCLEFQQLGEYK        | Carbamidomethyl (C); HDI 142 (K)                | 18                  |
| 957.24     | 4             | 3824.9307             | 373             | 402           | 71.87        | 0.0000051      | VFDEFKPLVEEPQNLIKQNCLEFQQLGEYK        | Carbamidomethyl (C); HDI 142 (K)                | 25                  |
| 1406.0119  | 3             | 4215.0139             | 373             | 402           | 58.66        | 0.0001         | VFDEFKPLVEEPQNLIKQNCLEFQQLGEYK        | Carbamidomethyl (C); HDI 532 (K)                | 18                  |
| 729.7402   | 3             | 2186.1987             | 373             | 389           | 51.61        | 0.0004         | VFDEFKPLVEEPQNLIK                     | HDI 142 (K)                                     | 16                  |
| 1094.106   | 2             | 2186.1974             | 373             | 389           | 54.55        | 0.00021        | VFDEFKPLVEEPQNLIK                     | HDI 142 (K)                                     | 19                  |
| 914.4733   | 3             | 2740.398              | 390             | 410           | 83.7         | 4.50E-07       | QNCLEFQQLGEYKFNALLVR                  | Carbamidomethyl (C); HDI 142 (K)                | 22                  |
| 1371.2047  | 2             | 2740.3948             | 390             | 410           | 91.82        | 7.10E-08       | QNCLEFQQLGEYKFNALLVR                  | Carbamidomethyl (C); HDI 142 (K)                | 14                  |
| 891.5279   | 2             | 1781.0412             | 414             | 428           | 63.66        | 0.0000092      | KVPQVSTPTLVEVSR                       | HDI 142 (K)                                     | 8                   |
| 594.6872   | 3             | 1781.0399             | 414             | 428           | 69.53        | 0.0000024      | KVPQVSTPTLVEVSR                       | HDI 142 (K)                                     | 8                   |
| 829.669    | 4             | 3314.6468             | 446             | 472           | 34.23        | 0.04           | MPCAEDYLSVVLNQLCVLHEKTPVSDR           | 2 Carbamidomethyl (C); HDI 142 (K)              | 22                  |
| 1105.8879  | 3             | 3314.6419             | 446             | 472           | 52.99        | 0.00054        | MPCAEDYLSVVLNQLCVLHEKTPVSDR           | 2 Carbamidomethyl (C); HDI 142 (K)              | 13                  |
| 804.9125   | 2             | 1607.8104             | 473             | 484           | 58.4         | 0.00019        | VTKCCTESLVNR                          | 2 Carbamidomethyl (C); HDI 142 (K)              | 10                  |
| 536.9433   | 3             | 1607.808              | 473             | 484           | 61.87        | 0.000089       | VTKCCTESLVNR                          | 2 Carbamidomethyl (C); HDI 142 (K)              | 9                   |
| 1074.2654  | 4             | 4293.0325             | 485             | 519           | 43.55        | 0.0032         | RPCFSALEVDETYVPKEFNAETFTFHADICTLSEK   | 2 Carbamidomethyl (C); HDI 142 (K)              | 23                  |
| 896.4286   | 3             | 2686.2639             | 501             | 521           | 49.46        | 0.0013         | EFNAETFTFHADICTLSEKER                 | Carbamidomethyl (C); HDI 142 (K)                | 8                   |
| 635.9079   | 2             | 1269.8013             | 525             | 534           | 54.81        | 0.000039       | KQTALVELVK                            | HDI 142 (K)                                     | 8                   |
| 424.2742   | 3             | 1269.8006             | 525             | 534           | 55.92        | 0.00003        | KQTALVELVK                            | HDI 142 (K)                                     | 7                   |
| 661.6806   | 3             | 1982.0198             | 542             | 557           | 75.65        | 0.0000036      | EQLKAVMDDFAAFVEK                      | HDI 142 (K)                                     | 11                  |
| 644.9713   | 3             | 1931.8919             | 546             | 560           | 39.73        | 0.01           | AVMDDFAAFVEKCK                        | 2 Carbamidomethyl (C); HDI 142 (K)              | 15                  |

Table E2. MS/MS data identifying HDI modified albumin peptides- pH 9.0 / 3 hr carbamoylation

| <i>m/z</i> | <i>charge</i> | <i>rel. mol. mass</i> | <i>AA start</i> | <i>AA end</i> | <i>Score</i> | <i>E-value</i> | <i>Sequence</i>                           | <i>Modifications</i>               | <i>matched ions</i> |
|------------|---------------|-----------------------|-----------------|---------------|--------------|----------------|-------------------------------------------|------------------------------------|---------------------|
| 966.9536   | 2             | 1931.8926             | 546             | 560           | 66.62        | 0.000021       | AVMDDFAAFVEKCK                            | 2 Carbamidomethyl (C); HDI 142 (K) | 12                  |
| 821.3742   | 2             | 1640.7339             | 561             | 573           | 53.11        | 0.00029        | ADDK <sup>+</sup> ETCF <sup>+</sup> AEEGK | Carbamidomethyl (C); HDI 142 (K)   | 10                  |
| 547.9185   | 3             | 1640.7336             | 561             | 573           | 54.72        | 0.0002         | ADDK <sup>+</sup> ETCF <sup>+</sup> AEEGK | Carbamidomethyl (C); HDI 142 (K)   | 8                   |
| 642.4056   | 2             | 1282.7967             | 574             | 585           | 75.41        | 3.90E-07       | KLV <sup>+</sup> AASQAALGL                | HDI 142 (K)                        | 7                   |
